# Supplementary material for: Rodents’ responses to manipulated plant litter and seed densities: implications for restoration
Source: PeerJ. 2020 Jul 6;8:e9465. doi: 10.7717/peerj.9465 (PMC7346862; doi:10.7717/peerj.9465)
Supplement: Supplemental Information 1 — The date, species, sex, reproductive condition, weight, age, treatment, and plot where individuals were captured. [file peerj-08-9465-s001.xlsx]

## Sheet: TrappingData
Date	Trap I.D.	Plot I.D.	Treatment	Species	recaptured	sex	Bagmass (g)	Bag Tare (g)	Weight (g)	Age	Reproductive Condition
2016-05-13	C1	1	SparseSeed	Perognathus flavus	No	female	19	10.5	8.5	Adult	inactive
2016-05-06	B4	5	DenseSeed	Perognathus flavus	No	female	17	12	5	Adult	inactive
2016-05-06	A3	5	DenseSeed	Perognathus flavus	No	female	20	14.5	5.5	Adult	inactive
2016-05-13	A3	1	SparseSeed	Perognathus flavus	No	female	36	22.5	13.5	Adult	inactive
2016-05-12	B3	3	SparseSeed	Perognathus flavus	No	male	40	29	11	Adult	inactive
2016-05-12	C2	3	SparseSeed	Perognathus flavus	No	female	19.5	11	8.5	Adult	estrus
2016-05-13	B3	3	SparseSeed	Perognathus flavus	No	female	23	18.5	4.5	Adult	estrus
2016-05-13	B6	3	SparseSeed	Perognathus flavus	No	escaped				Adult
2016-05-13	B6	3	SparseSeed	Perognathus flavus	Yes
2016-05-11	C3	7	DenseUnseed	Perognathus flavus	No	female	24	15	9	Adult	inactive
2016-05-12	B4	7	DenseUnseed	Perognathus flavus	No	female	40	12	28	Adult	inactive
2016-05-13	D2	7	DenseUnseed	Perognathus flavus	No	female	21	12	9	Adult	inactive
2016-05-06	C3	8	DenseUnseed	Perognathus flavus	No	female	16.5	9	7.5	Adult	inactive
2016-05-05	D3	8	DenseUnseed	Perognathus flavus	No	male	24	12.5	11.5	Adult	Scrotal
2016-05-06	D1	8	DenseUnseed	Perognathus flavus	No	male	30.5	27	3.5	Adult	Scrotal
2016-05-07	D5	8	DenseUnseed	Perognathus flavus	No	female				Adult	Pregnant
2016-05-07	C1	8	DenseUnseed	Perognathus flavus	No	female	20	14	6	Adult	Pregnant
2016-05-07	D1	8	DenseUnseed	Perognathus flavus	Yes
2016-05-12	B2	2	SparseUnseed	Perognathus flavus	No	female	26.5	12.5	14	Adult	inactive
2016-05-13	B6	2	SparseUnseed	Perognathus flavus	No	female	22.5	14	8.5	Adult	estrus
2016-05-05	C5	4	SparseUnseed	Perognathus flavus	No	female	21.5	12.5	9	Adult	inactive
2016-05-06	B4	4	SparseUnseed	Perognathus flavus	No	male	27	20	7	Adult	Scrotal
2016-05-06	C3	4	SparseUnseed	Perognathus flavus	No	male	30	12	18	Adult	Scrotal
2016-05-13	C2	1	SparseSeed	Dipodomys spectabilis	No	escaped				Adult
2016-05-11	B1	1	SparseSeed	Dipodomys spectabilis	No	female	174			Adult	inactive
2016-05-11	D4	1	SparseSeed	Dipodomys spectabilis	No	female	149.5	6.5	143	Adult	inactive
2016-05-11	A6	1	SparseSeed	Dipodomys spectabilis	No	female	166	25	141	Adult	estrus
2016-05-13	A6	1	SparseSeed	Dipodomys spectabilis	No	female	150	16	134	Adult	estrus
2016-05-11	A1	1	SparseSeed	Dipodomys spectabilis	No	male	174	27	147	Adult	Scrotal
2016-05-12	A4	3	SparseSeed	Dipodomys spectabilis	No	female	150	20	130	Adult	inactive
2016-05-12	D1	3	SparseSeed	Dipodomys spectabilis	No	female	151	8.5	142.5	Adult	estrus
2016-05-13	C2	3	SparseSeed	Dipodomys spectabilis	No	female	170	30.5	139.5	Adult	estrus
2016-05-12	D5	1	SparseSeed	Dipodomys spectabilis	Yes
2016-05-12	B1	1	SparseSeed	Dipodomys spectabilis	Yes
2016-05-12	A1	1	SparseSeed	Dipodomys spectabilis	Yes
2016-05-13	B1	1	SparseSeed	Dipodomys spectabilis	Yes
2016-05-13	D1	3	SparseSeed	Dipodomys spectabilis	Yes
2016-05-12	B1	7	DenseUnseed	Dipodomys spectabilis	No	escaped
2016-05-07	B2	8	DenseUnseed	Dipodomys spectabilis	No	female	150.5	31	119.5	Adult	inactive
2016-05-06	C5	8	DenseUnseed	Dipodomys spectabilis	No	male	151	13	138	Adult	Scrotal
2016-05-07	D4	8	DenseUnseed	Dipodomys spectabilis	No	escaped				Adult
2016-05-13	B1	7	DenseUnseed	Dipodomys spectabilis	Yes
2016-05-11	A1	2	SparseUnseed	Dipodomys spectabilis	No	female	148.5	15	133.5	Adult	inactive
2016-05-13	A3	2	SparseUnseed	Dipodomys spectabilis	No	escaped				Adult
2016-05-06	A3	4	SparseUnseed	Dipodomys spectabilis	No	female	130	4.5	125.5	Adult	inactive
2016-05-06	C2	4	SparseUnseed	Dipodomys spectabilis	No	female	151.5	21	130.5	Adult	inactive
2016-05-07	D6	4	SparseUnseed	Dipodomys spectabilis	No	female	135	14	121	Adult	estrus
2016-05-07	C6	4	SparseUnseed	Dipodomys spectabilis	No	female	170	26	144	Adult	estrus
2016-05-06	D6	4	SparseUnseed	Dipodomys spectabilis	No	male	150	15	135	Adult	Scrotal
2016-05-07	D1	4	SparseUnseed	Dipodomys spectabilis	No	male	150	14	136	Adult	Scrotal
2016-05-05	A3	4	SparseUnseed	Dipodomys spectabilis	No	unknown	141	19	122	Adult
2016-05-12	A1	2	SparseUnseed	Dipodomys spectabilis	Yes
2016-05-07	B3	4	SparseUnseed	Dipodomys spectabilis	Yes
2016-05-07	B4	4	SparseUnseed	Dipodomys spectabilis	Yes
2016-05-07	D2	4	SparseUnseed	Dipodomys spectabilis	Yes
2016-05-11	D6	1	SparseSeed	Onychomys leucogaster	No	male				Adult	inactive
2016-05-11	A2	1	SparseSeed	Onychomys leucogaster	No	male	50	22.5	27.5	Adult	inactive
2016-05-12	B2	3	SparseSeed	Onychomys leucogaster	No	escaped
2016-05-11	C1	3	SparseSeed	Onychomys leucogaster	No	female	54	31	23	Adult	lactating
2016-05-12	A2	1	SparseSeed	Onychomys leucogaster	Yes
2016-05-13	A2	1	SparseSeed	Onychomys leucogaster	Yes
2016-05-12	A1	3	SparseSeed	Onychomys leucogaster	Yes
2016-05-13	A3	3	SparseSeed	Onychomys leucogaster	Yes
2016-05-11	D4	7	DenseUnseed	Onychomys leucogaster	No	male	40	14	26	Adult	inactive
2016-05-06	A3	8	DenseUnseed	Onychomys leucogaster	No	male	50	24.5	25.5	Adult	inactive
2016-05-07	A1	8	DenseUnseed	Onychomys leucogaster	Yes
2016-05-06	D5	4	SparseUnseed	Onychomys leucogaster	No	male	50	16.5	33.5	Adult	inactive
2016-05-05	D5	4	SparseUnseed	Onychomys leucogaster	No	female	39	9	30	Adult	estrus
2016-05-13	C5	7	DenseUnseed	Neotoma micropus	No	unknown	200	13	187	Adult
2016-05-05	B1	6	DenseSeed	Perognathus flavescent	No	male	13	6	7	Adult	inactive
2016-05-11	C5	7	DenseUnseed	Neotoma albigula	No	female	119	18.5	100.5	Subadults	unapplicable
2016-11-08	C3	5	DenseSeed	Perognathus flavus	No	female	17	7	10	Adult	inactive
2016-11-03	B1	5	DenseSeed	Perognathus flavus	No	female	23	13	10	Adult	Pregnant
2016-11-08	D5	5	DenseSeed	Perognathus flavus	No	female	24	13	11	Adult	Pregnant
2016-11-08	D3	6	DenseSeed	Perognathus flavus	No	male	25	14	11	Adult	inactive
2016-11-08	B2	6	DenseSeed	Perognathus flavus	No	female	14	8.5	5.5	Adult	estrus
2016-11-08	D1	5	DenseSeed	Perognathus flavus	Yes
2016-10-28	C4	1	SparseSeed	Perognathus flavus	No	male	26	20	6	Adult	inactive
2016-11-08	A2	3	SparseSeed	Perognathus flavus	No	female	20	12	8	Adult	inactive
2016-11-07	B6	3	SparseSeed	Perognathus flavus	No	male	18	10	8	Adult	inactive
2016-11-08	C5	3	SparseSeed	Perognathus flavus	No	unknown	14	9	5	juvenile	unapplicable
2016-11-07	B1	3	SparseSeed	Perognathus flavus	No	female	15	7	8	Adult	Pregnant
2016-11-08	C5	3	SparseSeed	Perognathus flavus	No	female	24	9	15	Adult	lactating
2016-11-08	B1	3	SparseSeed	Perognathus flavus	Yes
2016-10-28	D5	7	DenseUnseed	Perognathus flavus	No	female	20	7	13	Adult	lactating
2016-10-27	A5	8	DenseUnseed	Perognathus flavus	No	female	15	7	8	Adult	inactive
2016-10-28	A3	8	DenseUnseed	Perognathus flavus	No	male	23	15	8	Adult	inactive
2016-11-03	A2	4	SparseUnseed	Perognathus flavus	No	female	17	11	6	Adult	inactive
2016-11-03	A4	4	SparseUnseed	Perognathus flavus	No	female	16	9	7	Adult	inactive
2016-11-03	C3	4	SparseUnseed	Perognathus flavus	No	male	19	8	11	Adult	Scrotal
2016-11-08	A3	4	SparseUnseed	Perognathus flavus	Yes
2016-11-03	D6	5	DenseSeed	Dipodomys spectabilis	No	female	180	12	168	Adult	estrus
2016-11-08	D6	6	DenseSeed	Dipodomys spectabilis	No	female	180	21	159	Adult	estrus
2016-10-27	B4	1	SparseSeed	Dipodomys spectabilis	No	female	154	14	140	Adult	inactive
2016-10-27	C1	1	SparseSeed	Dipodomys spectabilis	No	female	172	15	157	Adult	inactive
2016-10-29	C1	1	SparseSeed	Dipodomys spectabilis	No	male	152	22	130	Adult	inactive
2016-10-29	D4	1	SparseSeed	Dipodomys spectabilis	No	male	154	15	139	Adult	inactive
2016-10-27	B1	1	SparseSeed	Dipodomys spectabilis	No	unknown	147	13	134	Adult	inactive
2016-10-28	A5	1	SparseSeed	Dipodomys spectabilis	No	male	180	20	160	Adult	Scrotal
2016-10-29	D6	1	SparseSeed	Dipodomys spectabilis	No	escaped				Adult
2016-11-03	C3	3	SparseSeed	Dipodomys spectabilis	No	female	186	21	165	Adult	inactive
2016-11-03	B6	3	SparseSeed	Dipodomys spectabilis	No	male	178	9	169	Adult	inactive
2016-11-03	C2	3	SparseSeed	Dipodomys spectabilis	No	female	184	27	157	Adult	estrus
2016-10-28	A1	1	SparseSeed	Dipodomys spectabilis	Yes
2016-10-28	B1	1	SparseSeed	Dipodomys spectabilis	Yes
2016-10-28	C5	1	SparseSeed	Dipodomys spectabilis	Yes
2016-11-07	C3	3	SparseSeed	Dipodomys spectabilis	Yes
2016-11-07	C2	3	SparseSeed	Dipodomys spectabilis	Yes
2016-11-08	C3	3	SparseSeed	Dipodomys spectabilis	Yes
2016-11-08	A6	3	SparseSeed	Dipodomys spectabilis	Yes
2016-11-08	A1	3	SparseSeed	Dipodomys spectabilis	Yes
2016-10-29	B1	1	SparseSeed	Dipodomys spectabilis	No	unknown	152	7	145	Adult
2016-10-28	A1	7	DenseUnseed	Dipodomys spectabilis	No	female	144	9	135	Adult	inactive
2016-10-28	A5	8	DenseUnseed	Dipodomys spectabilis	No	female	154	8	146	Adult	inactive
2016-10-29	C1	2	SparseUnseed	Dipodomys spectabilis	No	male	192	8	184	Adult	inactive
2016-10-29	A2	2	SparseUnseed	Dipodomys spectabilis	No	unknown	172	19	153	Adult	inactive
2016-10-28	C2	2	SparseUnseed	Dipodomys spectabilis	No	female	130	10	120	Adult	estrus
2016-10-29	C5	2	SparseUnseed	Dipodomys spectabilis	No	escaped				Adult
2016-11-03	D6	4	SparseUnseed	Dipodomys spectabilis	No	female	130	9	121	subadult	unapplicable
2016-11-08	C6	4	SparseUnseed	Dipodomys spectabilis	No	female	149	7	142	Adult	inactive
2016-11-08	B1	4	SparseUnseed	Dipodomys spectabilis	No	female	164	10	154	Adult	inactive
2016-11-08	A2	4	SparseUnseed	Dipodomys spectabilis	No	female	130	6	124	subadult	unapplicable
2016-11-08	D6	4	SparseUnseed	Dipodomys spectabilis	No	male	138	7	131	Adult	inactive
2016-11-03	C6	4	SparseUnseed	Dipodomys spectabilis	No	male	156	6	150	Adult	estrus
2016-10-29	C3	2	SparseUnseed	Dipodomys spectabilis	Yes
2016-11-07	D6	4	SparseUnseed	Dipodomys spectabilis	Yes
2016-11-07	D5	4	SparseUnseed	Dipodomys spectabilis	Yes
2016-11-08	A6	4	SparseUnseed	Dipodomys spectabilis	Yes
2016-11-08	B6	4	SparseUnseed	Dipodomys spectabilis	Yes
2016-11-07	B4	3	SparseSeed	Onychomys leucogaster	No	unknown	34	9	25	subadult	unapplicable
2016-11-08	B2	3	SparseSeed	Onychomys leucogaster	Yes
2016-10-29	C5	7	DenseUnseed	Onychomys leucogaster	No	male	78	18	60	Adult	inactive
2016-10-29	C3	7	DenseUnseed	Onychomys leucogaster	No	female	75	17	58	Adult	Pregnant
2016-11-08	D1	4	SparseUnseed	Onychomys leucogaster	No	escaped	42			subadult	unapplicable
2016-11-08	D1	6	DenseSeed	Onychomys arenicola	No	female	49	12	37	Adult	Pregnant
2016-11-08	A5	3	SparseSeed	Onychomys arenicola	No	male	24	15	9	juvenile	unapplicable
2016-11-08	C1	3	SparseSeed	Onychomys arenicola	No	female	40	12	28	Adult	lactating
2016-10-27	A4	8	DenseUnseed	Onychomys arenicola	No	male	28	9	19	Adult	inactive
2016-10-28	D1	8	DenseUnseed	Onychomys arenicola	Yes
2016-10-29	B3	8	DenseUnseed	Onychomys arenicola	Yes
2016-10-28	A1	2	SparseUnseed	Onychomys arenicola	No	male				Adult	inactive
2016-11-03	D1	4	SparseUnseed	Onychomys arenicola	No	male	51	26	25	Adult	inactive
2016-11-03	D5	4	SparseUnseed	Onychomys arenicola	No	male	26	7	19	subadult	unapplicable
2016-11-07	A6	4	SparseUnseed	Onychomys arenicola	Yes
2016-11-08	B5	4	SparseUnseed	Onychomys arenicola	Yes
2016-10-29	C6	7	DenseUnseed	Neotoma micropus	No	male	190	6	184	Adult	inactive
2016-10-28	C5	7	DenseUnseed	Neotoma albigula	No	female	194	24	170	Adult	lactating
